# Supplementary material for: Conservation status of Brazilian snakes inhabiting the Atlantic Forest of Northeastern Brazil
Source: Frontiers journal article supplement (doi:10.3389/fevo.2024.1301717), 2024-01-25
Supplement: Table_1.DOCX [file Table_1.DOCX]

Supplementary material

**Table 1** Information used to create threat factor scores that may affect the survival of snakes in the Paraíba Atlantic Forest. Abbreviations are: Distribution breadth-DB; Habitat breadth-HB (BN = Brejos Nordestinos, Fl = Closed forest, Tb = Tabuleiro, Rt = Restinga, Mg = Mangrove); Endemicity-E; Rarity in the Paraíba Atlantic Forest-RR; Dietary breadth-DT (abn = amphisbaenian, amp = amphibian, ann = annelids, art = arthropods, bi = birds, cro = crocodylians, fi = fish, Mo = mollusks, li = lizard, mam = mammals, sn=snake; Habitat use and activity period-HT (Di=Diurnal, No=Nocturnal; SAB = semi-arboreal, AB = arboreal, TE = terrestrial, AQ = aquatic, CR = cryptozoic, FS=Fossorial);

Direct anthropogenic effects on species conservation status-AE (A= Consumption as food, M=medicinal, MR= magic/religious, P=Pets, O= ornamental or decorative, C= conflict, Rk= road killing); Body size-BS; Litter size-LS; Reproduction mode-RM (Vi= viviparous, Ov= oviparous); Frequency of reproduction-FR. The numbers in brackets represent the reference number from which the information was taken.

|  | **Distribution** | | | | **Ecological data** | | | **Life-history data** | | | |
| --- | --- | --- | --- | --- | --- | --- | --- | --- | --- | --- | --- |
| **Family/*Species*** | **DB (ha)** | **HB** | **E (km²)** | **RR** | **DT** | **HT** | **AE** | **BS (cm)** | **LS** | **RM** | **FR** |
| **Boidae** |  |  |  |  |  |  |  |  |  |  |  |
| *Boa constrictor* | 306239 | BN, Fl, Tb, Rt | <10% | 32 | mam (47.3%), li (36.8%), bi (15%) [1] | No, SAB, TE | A, M, MR, P, O, C, Rk | 206 | 18-60 [39,40,12] | Vi | seasonal [39] |
| *Corallus hortulana* | 1270 | Fl, Tb | <10% | 3 | mam (57%), bi (38.75%), li (2.5%), amp (1.25%) [1] | No, AB | M, C | 77.5 | 3-24 [39,40] | Vi | seasonal [39] |
| *Epicrates assisi* | 583276 | BN, Fl, Tb | <10% | 144 | mam (85.7%), li (14.2%) | No, TE | M, P, C, Rk | 158 | 7-14 [39] | Vi | seasonal [39] |
| **Colubridae** |  |  |  |  |  |  |  |  |  |  |  |
| *Chironius exoletus* | 235331 | BN, Fl, Tb | <10% | 19 | amp (100%) [2] | Di, TE | no effect | 115.2 | 4-12 [41,42] | Ov | seasonal [60] |
| *Chironius flavolineatus* | 449265 | BN, Fl, Tb | <10% | 60 | amp (100%) [2] | Di, AB | no effect | 128 | 3-8 [41,43] | Ov | seasonal [61] |
| *Dendrophidion atlantica* | 1058 | Fl | <10% | 1 | ~ (*D*. *dendrophis*) amp (100%) [3] | Di, TE | no effect | 67 | 3 | Ov | ~ (*D. dendrophis*) aseasonal [3] |
| *Drymarchon corais* | 28389 | Fl, Tb | <10% | 11 | amp (27.2%), abn (3%) li (15.1%), sn (24.2%), bi (18.2%), mam (12.1%) [4] | Di, TE | C, Rk | 172 | 3-15 [4] | Ov | aseasonal [4] |
| *Drymoluber dichrous* | 198353 | BN, Fl, Tb | <10% | 19 | li (73%), amp (26%) [5] | Di, TE | no effect | 93.5 | 2-6 [40,5] | Ov | aseasonal [62] |
| *Leptophis ahaetulla* | 213954 | Fl, BN | <10% | 37 | amp (92%) li (7.5%) [6] | Di, TE | M, C | 122.1 | 3-12 [8,12] | Ov | aseasonal [62] |
| *Palusophis bifossatus* | 73919 | Fl, BN | <10% | 8 | amp (79.5%), mam (9.7%) li (2.4%) [7] | Di, TE | no effect | 152 | 4-24 [44] | Ov | seasonal [63] |
| *Oxybelis aeneus* | 324137 | BN, Fl, Tb | <10% | 32 | li (93%), Amp (7.14%) [8] | Di, AB | C, Rk | 205.5 | 4-9 [40,8,12] | Ov | seasonal [64] |
| *Spilotes sulphureus* | 26240 | Fl | <10% | 19 | mam(100%) [9] | Di, TE/SAB | Rk | 245 | 11-15 [40,45] | Ov | aseasonal [5] |
| *Spilotes pullatus* | 345968 | BN, Fl, Tb | <10% | 22 | mam [86%], bi [14%] [10] | Di, TE/SAB | C, M, MR, Rk | 238.5 | 5-12 [40,46] | Ov | sazonal [60,65] |
| *Tantilla melanocephala* | 482170 | BN, Fl, Tb, Rt | <10% | 140 | art (100%) | FS | C | 36 | 1-3 [40,8] | Ov | aseasonal |
| **Dipsadidae** |  |  |  |  |  |  |  |  |  |  |  |
| *Apostolepis longicaudata* | 327 | Fl | <10% | 8 | sn (100%) [11] | FS | no effect | 35.2 | 2 | Ov | *~* (*A. assimilis*) aseasonal |
| *Apostolepis cearensis* | 102731 | Fl, Tb | <10% | 38 | sn (100%) [11] | FS | no effect | 53.9 | ~ (*A. longicaudata*) 2 | Ov | *~* (*A. assimilis*) aseasonal |
| *Boiruna sertaneja* | 249175 | Tb | <10% | 4 | sn[60.9%], li [30.4%], mam [8.6%] [12,13] | No, TE | C, Rk | 192 | 4-14 [12,13] | Ov | *~* (*B. maculata*)aseasonal [66] |
| *Caaeteboia gaeli* | 1511 | Fl | 12.19% | 2 | amp (100%) [11] | Di, TE | no effect | 41.1 | ~ (*Echinanthera occipitalis*) <5 [47] | Ov | *~* (*E. undulata*)seasonal [67] |
| *Erythrolamprus almadensis* | 26528 | Fl, Tb | <10% | 12 | amp (100%) [2] | Di, TE/AQ | no effect | 49.9 | 5 | Ov | *~* (*E. miliaris*) aseasonal [36] |
| *Erythrolamprus miliaris* | 607 | BN | <10% | 1 | amp (76%), fi (24%) [14] | No, TE/AQ | no effect | 101.5 [36] | 1-30 [36] | Ov | aseasonal [36] |
| *Erythrolamprus poecilogyrus* | 244470 | BN, Fl, Tb, Mg | <10% | 39 | amp (98.5%), (1.4%) [15] | Di, TE | Rk | 72.3 | 3-17[8,12] | Ov | aseasonal [68] |
| *Erythrolamprus taeniogaster* | 111037 | Fl, Tb, Rt | <10% | 28 | amp (60%), fi (40%) [2, 16] | Di, TE/AQ | no effect | 75.5 | 7-10 [16] | Ov | *~ E. miliaris* aseasonal [36] |
| *Erythrolamprus viridis* | 177143 | BN | <10% | 8 | amp (95.8%), li (4.1%) [8,12] | Di, TE | C | 48.5 | 2-7 [8,12] | Ov | *~* (*E. miliaris*) aseasonal [36] |
| *Helicops angulatus* | 375060 | Fl, Mg, Rt | <10% | 213 | fi (75.6%), amp (24%) | No, AQ | no effect | 96 | 2-20 [this work,40,5] | Ov | aseasonal |
| *Hydrodynastes gigas* | 123232 | Fl, Rt | <10% | 17 | amp (29.1%), fi (25%), sn (25%), mam (20.8%) [17] | Di, AQ | no effect | 195.6 | 14-42 [40, 48] | Ov | seasonal [69] |
| *Imantodes cenchoa* | 32620 | Fl, Tb | <10% | 19 | li (98%), amp (1.9%) [5, 18] | No, AB | Rk | 120.5 | 1-7 [40,5,49,18] | Ov | aseasonal [60, 49] |
| *Lygophis dilepis* | 237592 | BN, Fl | <10% | 13 | amp (100%) [8] | Di, TE | Rk | 48.2 | 4-6 [8] | Ov | aseasonal [12] |
| *Oxyrhopus guibei* | 226783 | BN, Fl, Tb | <10% | 17 | mam (86.1%), li (13.8%) [19, 20] | No, TE | no effect | 67.5 | 3-20 [50] | Ov | aseasonal [50] |
| *Oxyrhopus petolarius* | 314319 | BN, Fl, Tb | <10% | 29 | li (35%), mam (30%), bi (25%), amp (5%) [21] | No, TE | Rk | 110.8 | 2-12 [13,51] | Ov | aseasonal |
| *Oxyrhopus trigeminus* | 602569 | BN, Fl, Tb, Rt | <10% | 201 | li (63.8%), mam (22.2%), bi (17%) [8,12, 22] | No, TE | M, MR, C, Rk | 90 | 6-9 [8,12] | Ov | aseasonal |
| *Philodryas nattereri* | 523973 | BN, Fl, Tb | <10% | 73 | li (70%), mam (19.3%), amp (3.2%), sn (3.2%), bi (3.2%) [23] | Di, TE/SAB | MR, C, Rk | 150.5 | 4-13 [8,12] | Ov | *~* (*P. patagoniensis*) seasonal [70] |
| *Philodryas olfersii* | 561809 | BN, Fl, Tb, Mg | <10% | 104 | amp (52%), li (4.3%), bi (19%), mam (24%) [24] | Di, TE/SAB | M, MR, C, Rk | 143 | 1-16 [8,12, 52] | Ov | seasonal [71] |
| *Pseudablabes patagoniensis* | 216098 | Fl, Tb, Rt | <10% | 68 | Amp (38.7%), li (23%), mam (16%), bi (10.3%), sn (5.1%) [24] | Di, TE | Rk | 121.5 | 3-19 [52] | Ov | seasonal [70] |
| *Phimophis guerini* | 200778 | Fl, Tb, Rt | <10% | 12 | li (92%) mam (8.3%) [13] | No, TE | Rk | 81.3 | 3-7 [13] | Ov | **~** (*P. nigra*) aseasonal [53] |
| *Pseudoboa nigra* | 460953 | BN, Fl, Tb | <10% | 52 | li (86%), mam (5%), sn (2%) [21] | No, TE | C, Rk | 130.6 | 3-24 [13, 53] | Ov | aseasonal [53] |
| *Psomophis joberti* | 67862 | Fl | <10% | 14 | amp (50%), li (50%) [2, 25] | Di, TE | no effect | 42.4 | 7 [8, 54] | Ov | seasonal |
| *Sibon nebulatus* | 25999 | Fl, Tb | <10% | 16 | mo (100%) [26] | No, AB | Rk | 70.5 | 5 [56] | Ov | *~* (*S. sanniola*) seasonal [72] |
| *Dipsas neuwiedi* | 243645 | BN, Tb | <10% | 10 | mo (100%) [11] | No, TE | Rk | 44 | 4-12 [49] | Ov | seasonal [60, 49] |
| *Dipsas mikani* | 555118 | BN, Fl, Tb | <10% | 77 | mo (100%) [11] | No, TE | Rk | 48.5 | 3-10 [49] | Ov | seasonal [49] |
| *Siphlophis compressus* | 3378 | Tb | <10% | 4 | li (96%), sn (4%) [21] | No, AB | Rk | 70.1 | 3-12 [40,13,5] | Ov | seasonal [73] |
| *Dibernardia affinis* | 81017 | BN, Fl, Tb | <10% | 9 | li (33.3%), amp (33.3%), abn (16.6%), mam (16.6%) [27,28,29, 30] | CR | no effect | 37.7 | 5-7 [55] | Ov | seasonal [30] |
| *Adelphostigma occipitalis* | 525613 | BN, Fl, Tb | <10% | 53 | li (83%), amp (8.3%), abn (8.3%) [31, 30] | CR | no effect | 49.2 | 2 | Ov | seasonal [30] |
| *Thamnodynastes hypoconia* | 607 | BN | <10% | 2 | amp (96%), li (4%) [34] | No, TE/AB | no effect | 55.61 [37] | 4-13[34] | Vi | seasonal [34] |
| *Thamnodynastes pallidus* | 67769 | Fl, Tb | <10% | 106 | amp (100%) [12] | No, TE/AB | Rk | 56.9 | 3-6 [57,58] | Vi | *~* (*T. hypoconia*) seasonal[34] |
| *Xenodon merremii* | 422464 | BN, Fl, Tb | <10% | 105 | amp (100%) [8,12] | Di, TE | MR, Rk | 93 | 4-30[12] | Ov | seasonal [74] |
| *Xenopholis undulatus* | 607 | BN | <10% | 2 | amp (100%) [16,32] | No, TE | no effect | 19 [38] | 3 [59] | Ov | ~ (*X. Scalaris*) seasonal [75] |
| **Elapidae** |  |  |  |  |  |  |  |  |  |  |  |
| *Micrurus ibiboboca* | 547979 | BN, Fl, Tb | <10% | 191 | abn (58.3%), sna (33.3%), li (8.3%) [8,12] | CR | M, C, Rk | 135 | 9-14 | Ov | seasonal [76] |
| *Micrurus potyguara* | 274384 | Fl, Tb | 71% | 22 | ~ (*M*. *ibiboboca*) abn (58.3%), sna (33.3%), li (8.3%) [8,12] | CR | Rk | 83.7 | ~ (*M. ibiboboca*) 9-14 | Ov | seasonal [76] |
| **Leptotyphlopidae** |  |  |  |  |  |  |  |  |  |  |  |
| *Epictia borapeliotes* | 108512 | Fl, Rt | <10% | 16 | art (100%) [73] | FS | no effect | 19.8 | ~ (*Leptotyphlos koppesi*) ~10-15 [47] | Ov | ~ (*Liotyphlops beui***)** seasonal [77] |
| **Typhlopidae** |  |  |  |  |  |  |  |  |  |  |  |
| *Amerotyphlops arenensis* | 607 | BN | 32% | 33 | ~ (*A. brongersmianus*) art (100%) [33] | FS | no effect | 25 | 7-8 | Ov | ~ (*A. brongersmianus*) seasonal [33] |
| *Amerotyphlops brongersmianus* | 108334 | Fl, Tb | <10% | 84 | art [33] | FS | no effect | 38.3 | 4-5 [33] | Ov | seasonal [33] |
| *Amerotyphlops paucisquamus* | 36951 | Fl, Tb | <10% | 241 | ~ (*A. brongersmianus*) art (100%) [33] | FS | no effect | 19.8 | 4 | Ov | *~* (*A. brongersmianus*) seasonal [33] |
| **Viperidae** |  |  |  |  |  |  |  |  |  |  |  |
| *Bothrops leucurus* | 506520 | Fl, Tb, Mg | <10% | 119 | amp (33%), li (24%), sn (9%), bi(2%), mam (18%) | No, TE | C | 169 | 6-22 | Vi | seasonal |
| *Crotalus durissus* | 46449 | Rt | <10% | 12 | mam (100%) [12, 2, 25] | No, TE | M, MR, O, C | 130.5 | 21-31 [12] | Vi | seasonal [78] |
| *Lachesis muta* | 26003 | Fl | <10% | 4 | mam (100%) [16, 5] | No, TE | A, M, C | 202.5 | 1-14 [5, 35] | Ov | seasonal [35] |

References

1. Pizzatto, L., Marques, O. A. V., and Facure, K. (2009). Food habits of Brazilian boid snakes: Overview and new data, with special reference to *Corallus hortulanus*. *Amphib. Reptil.* 30, 533–544. doi: 10.1163/156853809789647121.

2. Rodrigues, G. M., Maschio, G. F., and Prudente, A. L. C. (2016). Snake assemblages of Marajó Island, Pará state, Brazil. *Zoologia* 33, 1–13. doi: 10.1590/S1984-4689zool-20150020.

3. Prudente, A. L. C., Maschio, G. F., Yamashina, C. E., and Santos-Costa, M. C. (2007). Morphology, Reproductive Biology and Diet of *Dendrophidion Dendrophis* (Schlegel, 1837) (Serpentes, Colubridae) in Brazilian Amazon. *South Am. J. Herpetol.* 2, 53–58. doi: 10.2994/1808-9798(2007)2[53:mrbado]2.0.co;2.

4. Prudente, A. L. da C., Menks, A. C., da Silva, F. M., and Maschio, G. F. (2014). Diet and reproduction of the western indigo snake *Drymarchon corais* (serpentes: Colubridae) from the Brazilian Amazon. *Herpetol. Notes* 7, 99–108.

5. Martins, M., and Oliveira, M. E. (1998). Natural history of snakes in forests of the Manaus region, Central Amazonia, Brazil. *Herpetol. Nat. Hist.* 6, 78–150.

6. Albuquerque, N. R., Galatti, U., and Di-Bernardo, M. (2007). Diet and feeding behaviour of the Neotropical parrot snake (*Leptophis ahaetulla*) in northern Brazil. *J. Nat. Hist.* 41, 1237–1243. doi: 10.1080/00222930701400954

7. Leite, P. T., Nunes, S. F., and Cechin, S. Z. (2007). Dieta e uso de habitat da jararaca-do-brejo, *Mastigodryas bifossatus* Raddi (Serpentes, Colubridae) em domínio subtropical do Brasil. *Rev. Bras. Zool.* 24, 729–734. doi: 10.1590/S0101-81752007000300025.

8. Mesquita, P. C. M. D., Passos, D. C., Borges-Nojosa, D. M., and Cechin, S. Z. (2013). Ecologia e história natural das serpentes de uma área de Caatinga no nordeste Brasileiro. *Pap. Avulsos Zool.* 53, 99–113. doi: 10.1590/S0031-10492013000800001.

9. Rufino, N., and Bernardi, J. A. R. (1999). Natural History Notes. *Pseustes sulphureus sulphureus*. Diet. *Herpetol. Rev.* 30, 103–104.

10. Marques, O. A. V., Muniz-Da-Silva, D. F., Barbo, F. E., Cardoso, S. R. T., Maia, D. C., and Almeida-Santos, S. M. (2014). Ecology of the Colubrid Snake *Spilotes pullatus* from the Atlantic Forest of Southeastern Brazil. *Herpetologica* 70, 407–416. doi: 10.1655/herpetologica-d-14-00012.

11. Marques, O. A. V., Eterovic, A., and Sazima, I. (2019). *Serpentes da Mata Atlântica - guia ilustrado para as florestas costeiras do Barsil*. Cotia: Ponto A.

12. Vitt, L. J., and Vangilder, L. D. (1983). Ecology of a Snake Community in Northeastern Brazil. *Amphibia-Reptilia* 4, 273–296.

13. Gaiarsa, M. P., Alencar, L. R. V., and Martins, M. (2013). Natural History of Pseudoboine Snakes. *Pap. Avulsos Zool.* 53. doi: 10.1590/S0031-10492013001900001.

14. Pizzatto, L. (2003). Reprodução de *Liophis miliaris* (Serpentes: Colubridae) no Brasil: influência histórica e variações geográficas.

15. Prieto, Y.A., Giraudo, A.R., and López, M.S. (2012). Diet and sexual dimorphism of *Liophis poecilogyrus* (Serpentes, Dipsadidae) from the wetland regions of Northeast Argentina. *J Herpetol* 46, 402–406. <https://doi.org/10.1670/10-228>

16. Cunha, O. R., and Nascimento, F. P. (1993). Ofídios da Amazônia. As cobras da região leste do Pará. *Bol. do Mus. Para. Emílio Goeldi* 9, 1–188.

17. López, M. S., and Giraudo, A. R. (2004). Diet of the large water snake *Hydrodynastes gigas* (Colubridae) from northeast Argentina. *Amphibia-Reptilia* 25, 178–184.

18. Sousa, K. R. M., Prudente, A. L. C., and Maschio, G. F. (2014). Reproduction and diet of *Imantodes cenchoa* (Dipsadidae: Dipsadinae) from the Brazilian Amazon. *Zoologia* 31, 8–19. doi: 10.1590/S1984-46702014000100002.

19. Barbo, F. E., Marques, O. A. V., and Sawaya, R. J. (2011). Diversity, Natural History, and Distribution of Snakes in the Municipality of São Paulo. *South Am. J. Herpetol.* 6, 135–160. doi: 10.2994/057.006.0301.

20. Andrade, R. O., and Silvano, R. A. M. (1996). Comportamento alimentar e dieta da “Falsa-Coral” *Oxyrhopus guibei* Hoge & Romano (SERPENTES, COLUBRIDAE). *Rev. Bras. Zool.* 13, 143–150.

21. Alencar, L. R. V., Gaiarsa, M. P., and Martins, M. (2013). The evolution of diet and microhabitat use in Pseudoboine snakes. *South Am. J. Herpetol.* 8, 60–66. doi: 10.2994/sajh-d-13-00005.1.

22. Alencar, L. R. V., Galdino, C. A. B., and Nascimento, L. B. (2012). Life History Aspects of *Oxyrhopus trigeminus* (Serpentes: Dipsadidae) from Two Sites in Southeastern Brazil. *J. Herpetol.* 46, 9–13. doi: 10.1670/09-219.

23. Mesquita, P. C. M. D., Borges-Nojosa, D. M., Passos, D. C., and Bezerra, C. H. (2011). Ecology of Philodryas nattereri in the Brazilian semi-arid region. *Herpetol. J.* 21, 193–198.

24. Hartmann, P. A., and Marques, O. A. V. (2005). Diet and habitat use of two sympatric species of Philodryas (Colubridae), in south Brazil. *Amphibia-Reptilia* 26, 25–31. doi: 10.1163/1568538053693251.

25. Strussmann, C., and Sazima, I. (1993). The snake assemblage of the Pantanal at Poconé, Western Brazil: Faunal composition and ecological summary. *Stud. Neotrop. Fauna Environ.* 28, 157–168. doi: 10.1080/01650529309360900.

26. Duellman, W. E. . (2005). *Cusco Amazonico: the lives of amphibians and reptiles in an Amazonian rainforest*.

27. Barbo, F. E., and Marques, O. A. V. (2003). Do aglyphous colubrid snakes prey on live amphisbaenids able to bite? *Phyllomedusa* 2, 113–114. doi: 10.11606/issn.2316-9079.v2i2p113-114.

28. Sousa, B. M., and Cruz, C. A. G. (2000). Echinanthera affinis (NCN). Diet. *Herpetol. Rev.* 31, 178–178.

29. Zacariotti, R. L., and Gomes, C. A. (2010). Diet of the black-headed forest racer Taeniophallus affinis Günther, 1858 in the Brazilian Atlantic forest. *Herpetol. Notes* 3, 11–12.

30. Gomes, C. (2012). História natural das serpentes dos gêneros *Echinanthera* e *Taeniophallus* (Echinantherini). *Dissertation*.

31. Balestrin, R. L., and Di-Bernardo, M. (2005). Ophiophagy in the colubrid snake *Echinanthera occipitalis* (JAN, 1863) from southern Brazil. *Salamandra* 41, 221–222.

32. Kokobum, M. N. C., and Maciel, M. N. (2010). *Scinax fuscovarius* NCN). Predation. *Herpetol. Rev.* 41, 480–481.

33. Avila, R. W., Ferreira, V. L., and Souza, V. B. (2006). Biology of the blindsnake *Typhlops brongersmianus* (Typhlopidae) in a semideciduous forest from Central Brazil. *Herpetol. J.* 16, 403–405. doi: 10.1080/714004044.

34. Bellini, G., Arzamendia, V., and Giraudo, A. R. (2013). Ecology of *Thamnodynastes hypoconia* in Subtropical – Temperate South America. *Herpetologica* 69, 67–79. doi: 10.2307/23352108.

35. Alves, F. Q., Argôlo, A. J. S., and Carvalho, G. C. (2014). Reproductive biology of the bushmaster *Lachesis muta* (Serpentes: Viperidae) in the Brazilian Atlantic Forest. *Phyllomedusa* 13, 99–109. doi: 10.11606/issn.2316-9079.v13i2p99-109.

36. Pizzatto, L., and Marques, O. A. V. (2006). Interpopulational variation in sexual dimorphism, reproductive output, and parasitism of *Liophis miliaris* (Colubridae) in the Atlantic forest of Brazil. *Amphibia-Reptilia* 27, 37–46. doi: 10.1163/156853806776052128.

37. Franco, F. L., Trevine, V. C., Montingelli, G. G., and Zaher, H. (2017). A new species of *Thamnodynastes* from the open areas of central and Northeastern Brazil (Serpentes: Dipsadidae: Tachymenini). *Salamandra* 53, 339–350. doi: 10.5281/zenodo.2585678.

38. Guedes, T.B. (2018). *Xenopholis undulatus* (Jensen's Groundsnake) Diet*. Herpetol Rev* 49,142

39. Pizzatto, L., and Marques, O. A. V. (2007). Reproductive Ecology of Boine Snakes With Emphasis on Brazilian Species and a Comparison To Pythons. *South Am. J. Herpetol.* 2, 107–122. doi: 10.2994/1808-9798(2007)2[107:reobsw]2.0.co;2.

40. Fraga, R., Lima, A. P., Prudente, A. L. C., and Magnusson, W. E. (2013). *Guia de Cobras da região de Manaus- Amazonia Central*. Editopa In. Manaus.

41. Dixon JR, Wiest Jr JA, Cei JM (1996) Revision of the Neotropical snake genus *Chironius Fitzinger* (Serpentes, Colubridae). Copeia 1996: 504-506

42. Goldberg, S. R. (2007). Note on Reproduction of Whipsnakes, Genus *Chironius* (Serpentes: Colubridae), from Costa Rica. *Bull. Chiccarago Herpetol. Soc.* 42, 148–149.

43. Hamdan, B., and Fernandes, D. S. (2015). Taxonomic revision of *Chironius flavolineatus* (Jan, 1863) with description of a new species (Serpentes: Colubridae). *Zootaxa* 4012, 97–119. doi: 10.11646/zootaxa.4012.1.5.

44. Costa, H. C., Pantoja, D. L., Pontes, J. L., and Feio, R. N. (2010). Snakes of the municipality of viçosa, Atlantic Forest of southeastern Brazil . *Biota Neotrop.* 10, 354–377. <https://doi.org/10.1590/S1676-06032010000300033>

45. Morais, M. S. R., França, R. C., Delfim, F. R., and França, F. G. R. (2018). Eggs and hatchling morphometry of *Spilotes sulphureus* (Wagler in Spix, 1824) (Serpentes: Colubridae: Colubrinae: Colubroidea: Caenophidia) from northeastern Brazil. *Herpetol. Notes* 11, 441–444.

46. Hauzman, E., Costa, A. C. O. R., and Scartozonni, R. R. (2005). *Spilotes pullatus* (Tiger Ratsnake). Reproduction. *Herpetol. Rev.* 36, 328.

47. França, F. G. R., and Araújo, A. F. B. (2006). The Conservation Status of Snakes in Central Brazil. *South Am. J. Herpetol.* 1, 25–36. doi: https://doi.org/10.2994/1808-9798(2006)1[25:TCSOSI]2.0.CO;2.

48. Vogel, Z. (1958). Surucucu do Pantanal. *Aquar Terrar Zeitschr* 11, 178–181.

49. Pizzatto, L., Cantor, M., Oliveira, J. L., Marques, O. A. V., Capovilla, V., and Martins, M. (2008). Reproductive Ecology of *Dipsadine* Snakes, with emphasis on South American species. *Herpetologica* 64, 168–179. doi: 10.1655/07-031.1.

50. Pizzatto, L., and Marques, O. A. V. (2002). Reproductive biology of the false coral snake *Oxyrhopus guibei* (Colubridae) from southeastern Brazil. *Amphib. Reptil.* 23, 495–504. doi: 10.1163/15685380260462392.

51. Lynch, J. D. (2009). Snakes of the genus *Oxyrhopus* (Colubridae: Squamata) in Colombia: Taxonomy and geographic variation. *Pap. Avulsos Zool.* 49, 319–337. doi: 10.1590/s0031-10492009002500001.

52. Fowler, I. R., Salomão, M. G., and Jordão, R. S. (1998). A description of the female reproductive cycle in four species from the Neotropical colubrid snake *Philodryas* (Colubridae, Xenodontinae). *The Snake* 28, 71–78.

53. Orofino, R. D. P., Pizzatto, L., and Marques, O. A. V. (2010). Reproductive biology and food habits of *Pseudoboa nigra* (Serpentes: Dipsadidae) from the. *Phyllomedusa* 9, 53–61. doi: 10.11606/issn.2316-9079.v9i1p53-61.

54. Mesquita, P.C.M.D., Brito W., Borges-Nojosa, D.M. (2011). Natural History Notes: *Psomophis joberti* (NCN). Reproduction. *Herpetol Rev* 42, 302.

55. Amaral, A. (1978). *Serpentes do Brasil: iconografia colorida*. 2a edição. São Paulo: Melhoramentos e EADUSP.

56. Boos, H.E.A. (2001). The snakes of Trinidad and Tobago. Texas A&M University Press.

57. Araújo, P. F., Silva, W. M., França, R. C., and França, F. G. R. (2018). A case of envenomation by neotropical opisthoglyphous snake *Thamnodynastes pallidus* (Linnaeus, 1758) (Colubridae: Dipsadinae: Tachymenini) in Brazil. *Rev. Inst. Med. Trop. Sao Paulo* 60, 11–14. doi: 10.1590/S1678-9946201860038.

58. Cunha, O. R., and Nascimento, F. P. (1981). Ofídios da Amazônia. XII - Observações sobre a viviparidade em ofídios do Pará e Maranhão (Ophidia: Aniliidae, Boidea, Colubridae e Viperidae. *oletim do Mus. Para. Emilio Goeldi. Nov. Série Zool.*, 24.

59. Costa, H. C., Clara, M., and Gurgel, C. (2013). *Xenopholis undulatus* (Serpentes: Xenodontinae ): Reprodução e alimentação em cativeiro. *Herpetol. Bras.* 2, 36–38.

60. Marques, O. A. V, and Sazima, I. (2004). “História Natural dos Répteis da Estação Ecológica Juréia‑Itatins,” in *Estação Ecológica Juréia‑Itatins. Ambiente Físico, Flora e Fauna*, eds. O. A. V. Marques and W. Duleba (Ribeirão Preto: Holos), 257–277.

61. Marques, O. A. V., Almeida-Santos, S. M., Rodrigues, M., and Camargo, R. (2009). Mating and Reproductive Cycle in the Neotropical Colubrid Snake *Chironius bicarinatus*. *South Am. J. Herpetol.* 4, 76–80. doi: 10.2994/057.004.0110.

62. Santos-Costa, M. C., Maschio, G. F., and Prudente, A. L. C. (2015). Natural history of snakes from Floresta Nacional de Caxiuanã, eastern Amazonia, Brazil. 8, 69–98.

63. Leite, P. T., Nunes, S. de F., Kaefer, I. L., and Cechin, S. Z. (2009). Reproductive biology of the swamp racer *Mastigodryas bifossatus* (Serpentes: Colubridae) in subtropical Brazil. *Zoologia* 26, 12–18. doi: 10.1590/S1984-46702009000100003.

64. Censky, E. J., and Mccoy, C. J. (1988). Female Reproductive Cycles of Five Species of Snakes (Reptilia : Colubridae) from the Yucatan Peninsula, Mexico. *Biotropica* 20, 326–333. [https://doi.org/10.2307/2388323](http://dx.doi.org/10.2307/2388323)

65. Hauzman, E., Costa, A.C.O.R., Scartozzoni, R.R. (2005). *Spilotes pullatus* Reproduction. *Herpetol Rev* 36, 328.

66. Pizzatto, L. (2005). Body size, reproductive biology and abundance of the rare pseudoboini snakes genera *Clelia* and *Boiruna* (Serpentes, Colubridae) in Brazil. *Phyllomedusa* 4, 111–122. doi: 10.11606/issn.2316-9079.v4i2p111-122. <https://doi.org/10.11606/issn.2316-9079.v4i2p111-122>

67. Gomes, C. A., and Marques, O. A. V. (2012). Food Habits, Reproductive Biology, and Seasonal Activity of the Dipsadid Snake, *Echinanthera undulata* (Wied, 1824), from the Atlantic Forest in Southeastern Brazil. *South Am. J. Herpetol.* 7, 233–240. doi: 10.2994/057.007.0305.

68. Pinto, R. R., and Fernandes, R. (2004). Reproductive biology and diet of *Liophis poecilogyrus poecilogyrus* (Serpentes, Colubridae) from southeastern Brazil. *Phyllomedusa* 3, 9–14.

69. Giraudo, A. R., Arzamendia, V., Bellini, G. P., Bessa, C. A., and Costanzo, M. B. (2014). Ecología de una gran serpiente Sudamericana, *Hydrodynastes gigas* (Serpentes: Dipsadidae). *Rev. Mex. Biodivers.* 85, 1206–1216. doi: 10.7550/rmb.43765.

70. López, M. S., and Giraudo, A. R. (2008). Ecology of the snake *Philodryas patagoniensis* (Serpentes, Colubridae) from northeast Argentina. *J. Herpetol.* 42, 474–480. doi: 10.1670/07-087.1.

71. Mesquita, P. C. M. D., Sá-Polidoro, G. L., and Cechin, S. Z. (2013b). Reproductive biology of *Philodryas olfersii* (Serpentes, Dipsadidae) in a subtropical region of Brazil. *Herpetol. J.* 23, 39–44.

72. Kofron, C. P. (1983). Female Reproductive Cycle of the Neotropical Snail-Eating Snake *Sibon sanniola* in Northern Yucatan, Mexico. *Copeia* 1983, 963. doi: 10.2307/1445097.

73. Pradel, R., Malqui, J., Venegas, P.J. (2017). *Siphlophis compressus* (Tropical Flat Snake) Reproduction. *Herpetol Rev* 48, 219.

74. Jordão, R.S. (1996). Estudo comparativo da alimentação e da reprodução de *Waglerophis merremi* e *Xenodon neuwiedii* (Serpentes: Colubridae). Dissertation, Universidade de São Paulo

75. Fraga, R., Vieira, C.B. (2012) Reprodução, dieta e variações na folidose de *Xenopholis scalaris* (serpentes: colubridae). Congresso de Iniciação Científica PIBIC/CNPq - PAIC/FAPEAM

76. Silva Jr, N. J. (2016). *As cobras-corais do Brasil: biologia, taxonomia, venenos e envenenamentos*. Goiânia: Editora da PUC.

77. Parpinelli, L., and Marques, O. A. V. (2015). Reproductive biology and food habits of the blindsnake *Liotyphlops beui* (Scolecophidia: Anomalepididae). *South Am. J. Herpetol.* 10, 205–210. doi: 10.2994/SAJH-D-15-00013.1.

78. Almeida-Santos, S. M., and Orsi, A. M. (2002). Ciclo Reprodutivo de *Crotalus durissus* e *Bothrops jararaca* (Serpentes, Viperidae): morfologia e função do oviduto. *Rev Bras Reprod Anim* 26, 109–112.
